# Supplementary material for: Genome-Wide Survey of Gut Fungi (Harpellales) Reveals the First Horizontally Transferred Ubiquitin Gene from a Mosquito Host
Source: PubMed Central journal article supplement — Mol Biol Evol. 2016 Jun 24;33(10):2544–54. doi: 10.1093/molbev/msw126 (PMC5026252; doi:10.1093/molbev/msw126), 2016-06-24
Supplement: supp_msw126_MBE-16-0186.R1_SupplementaryFiles.pdf [file supp_msw126_MBE-16-0186.R1_SupplementaryFiles.pdf]

## Supplementary Materials

Supplementary Fig. 1. Phylogenetic tree derived from maximum likelihood analysis using the upstream flanking S\_TKc gene and its homologs in both animal and fungi. Maximum likelihood bootstrap proportions are shown at nodes. *Zancudomyces culisetae* is in bold, indicating its fungal origin.

Supplementary Fig. 2. Phylogenetic tree derived from Bayesian analysis using all copies of polyubiquitin amino acid sequences through whole genomes, including both orthologs and paralogs (labeled as “P”). Annotations as in Fig. 2a.

Supplementary Fig. 3. Transmembrane helix prediction for the triple-ubiquitin gene and its flanking genes from the *Zancudomyces culisetae* genome. The posterior probability for transmembrane helix (red), inside (blue), or outside (pink) membrane is plot along the amino acid positions. (There is one transmembrane helix as predicted at one end of the LamG protein)

Supplementary Table 1. BLAT mapping results between five HGT candidates from *Z. culisetae* and Harpellales insect host genomes.

Supplementary Table 2. All homologs detected from the examined eukaryotic genomes using *Z. culisetae*'s triple-ubiquitin gene as a query (E-value <  $1E^{-100}$ ).

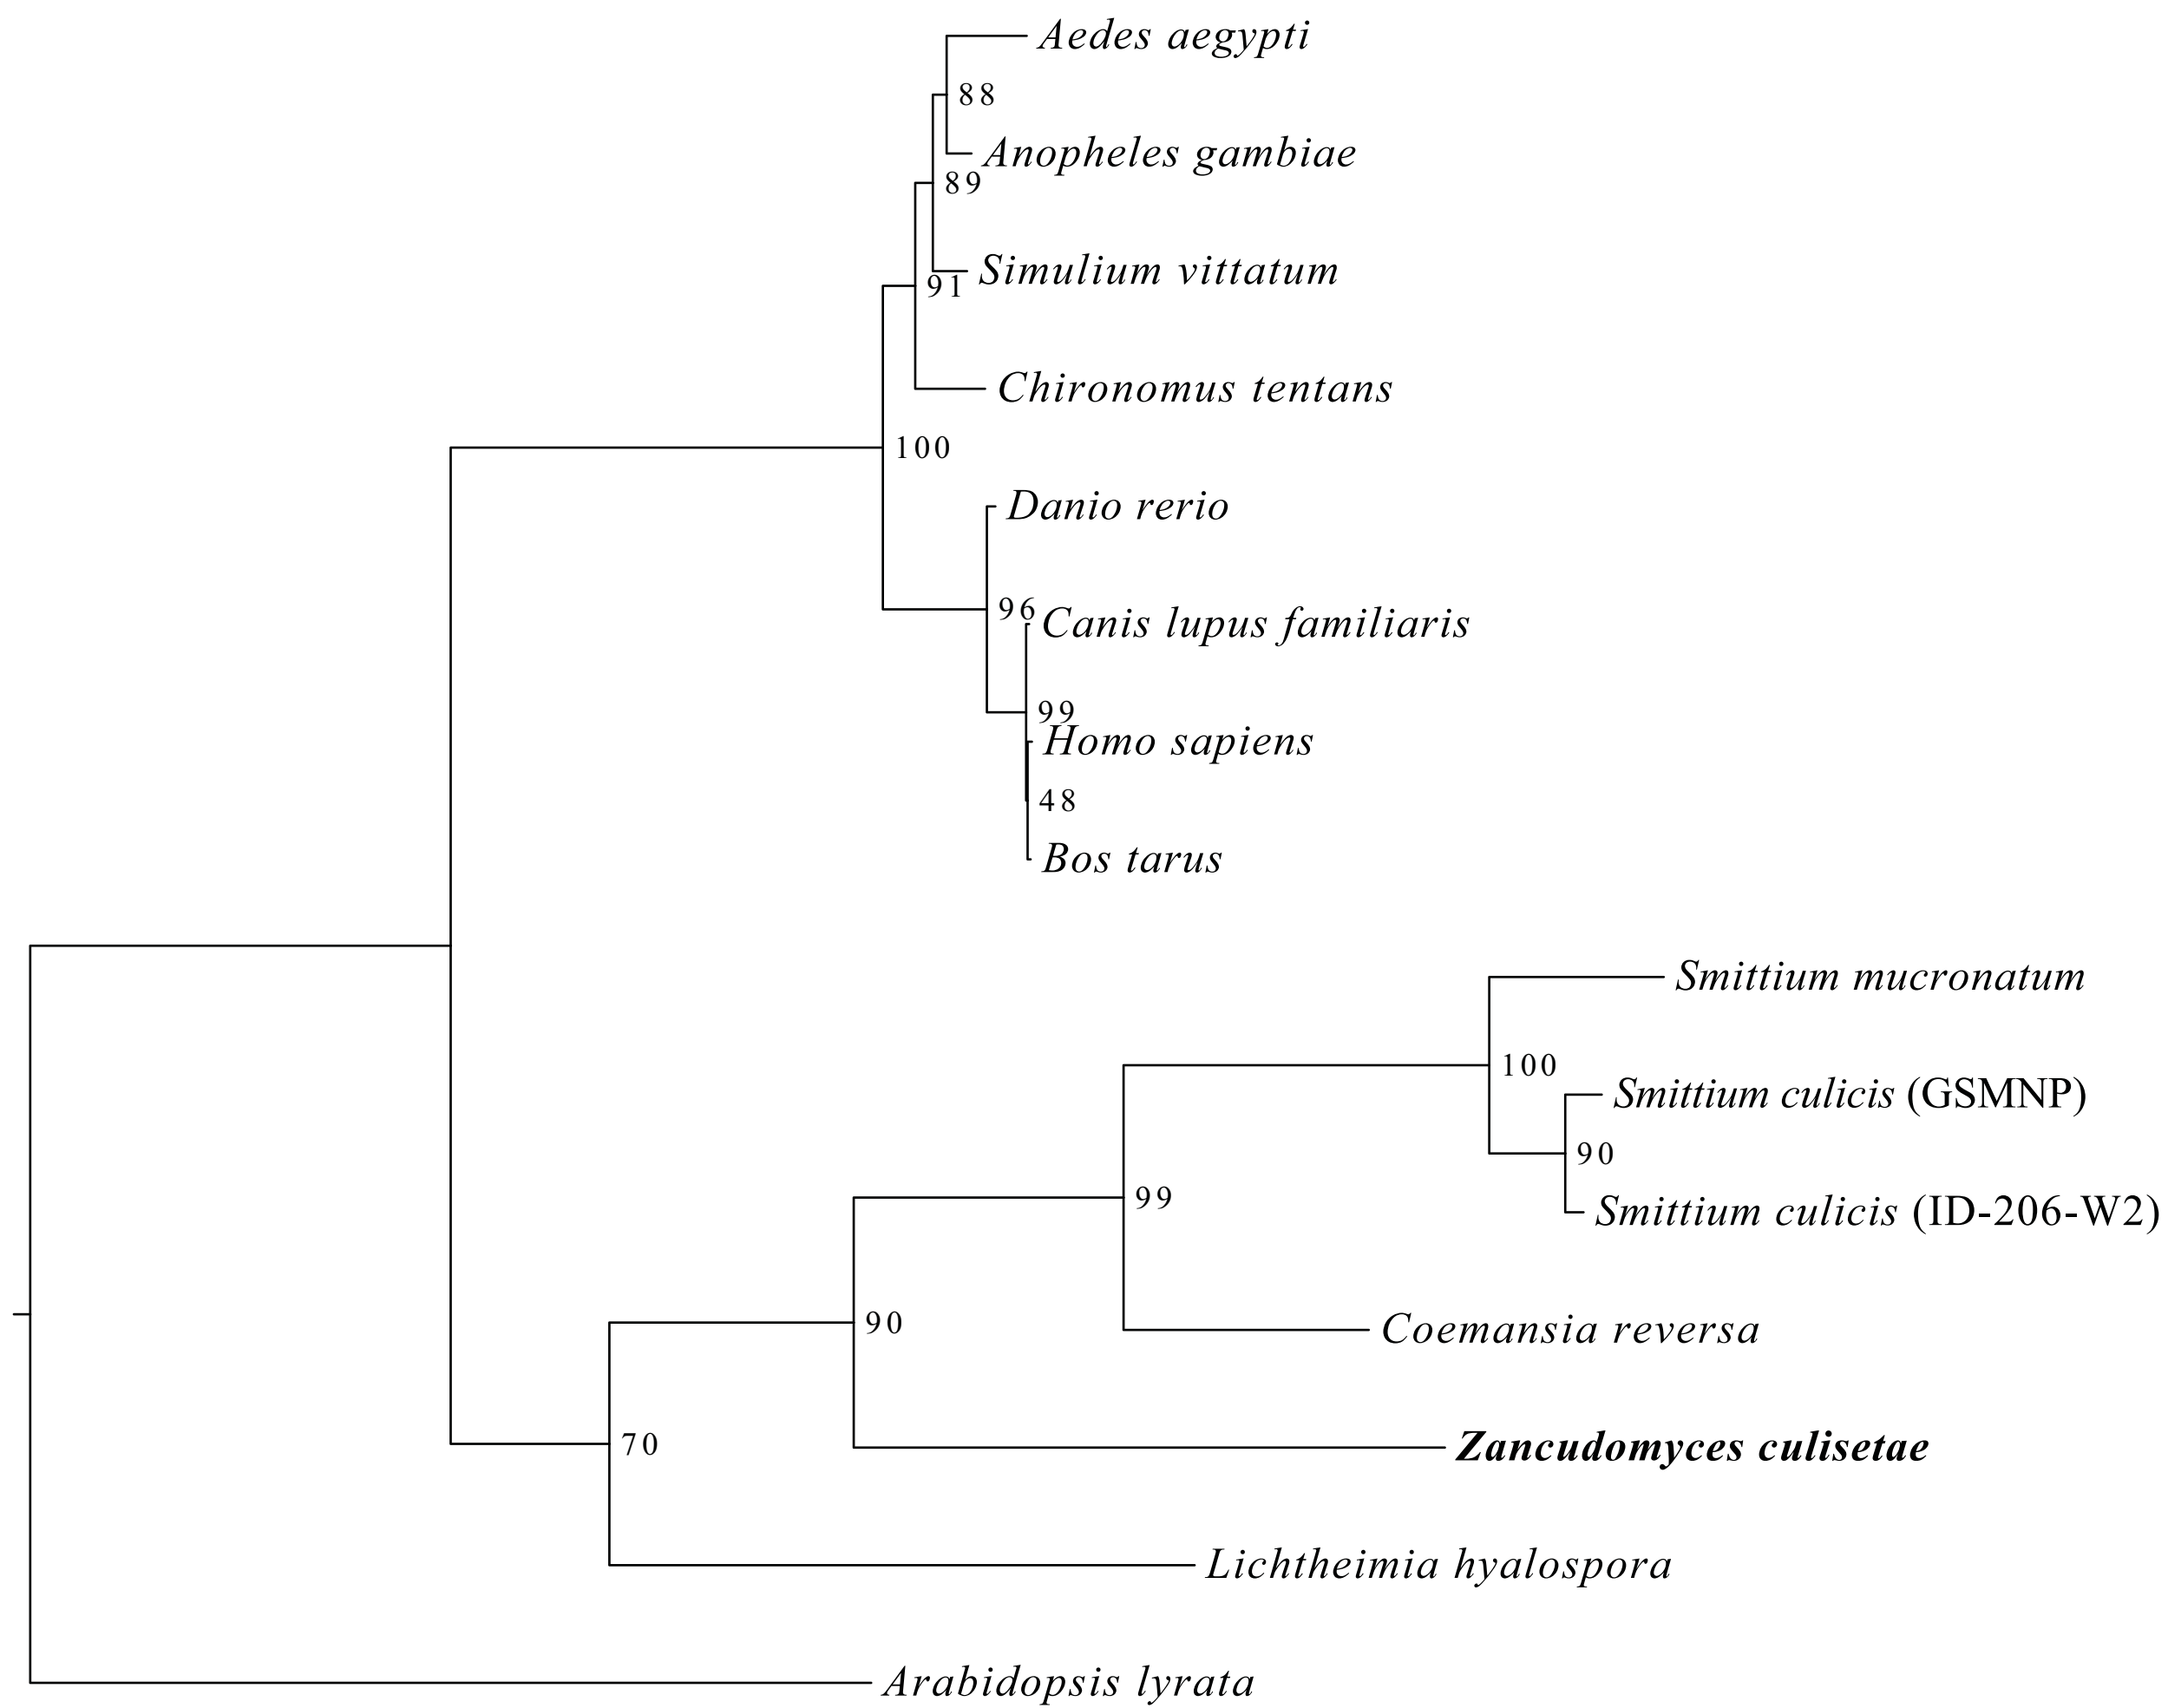

0.3

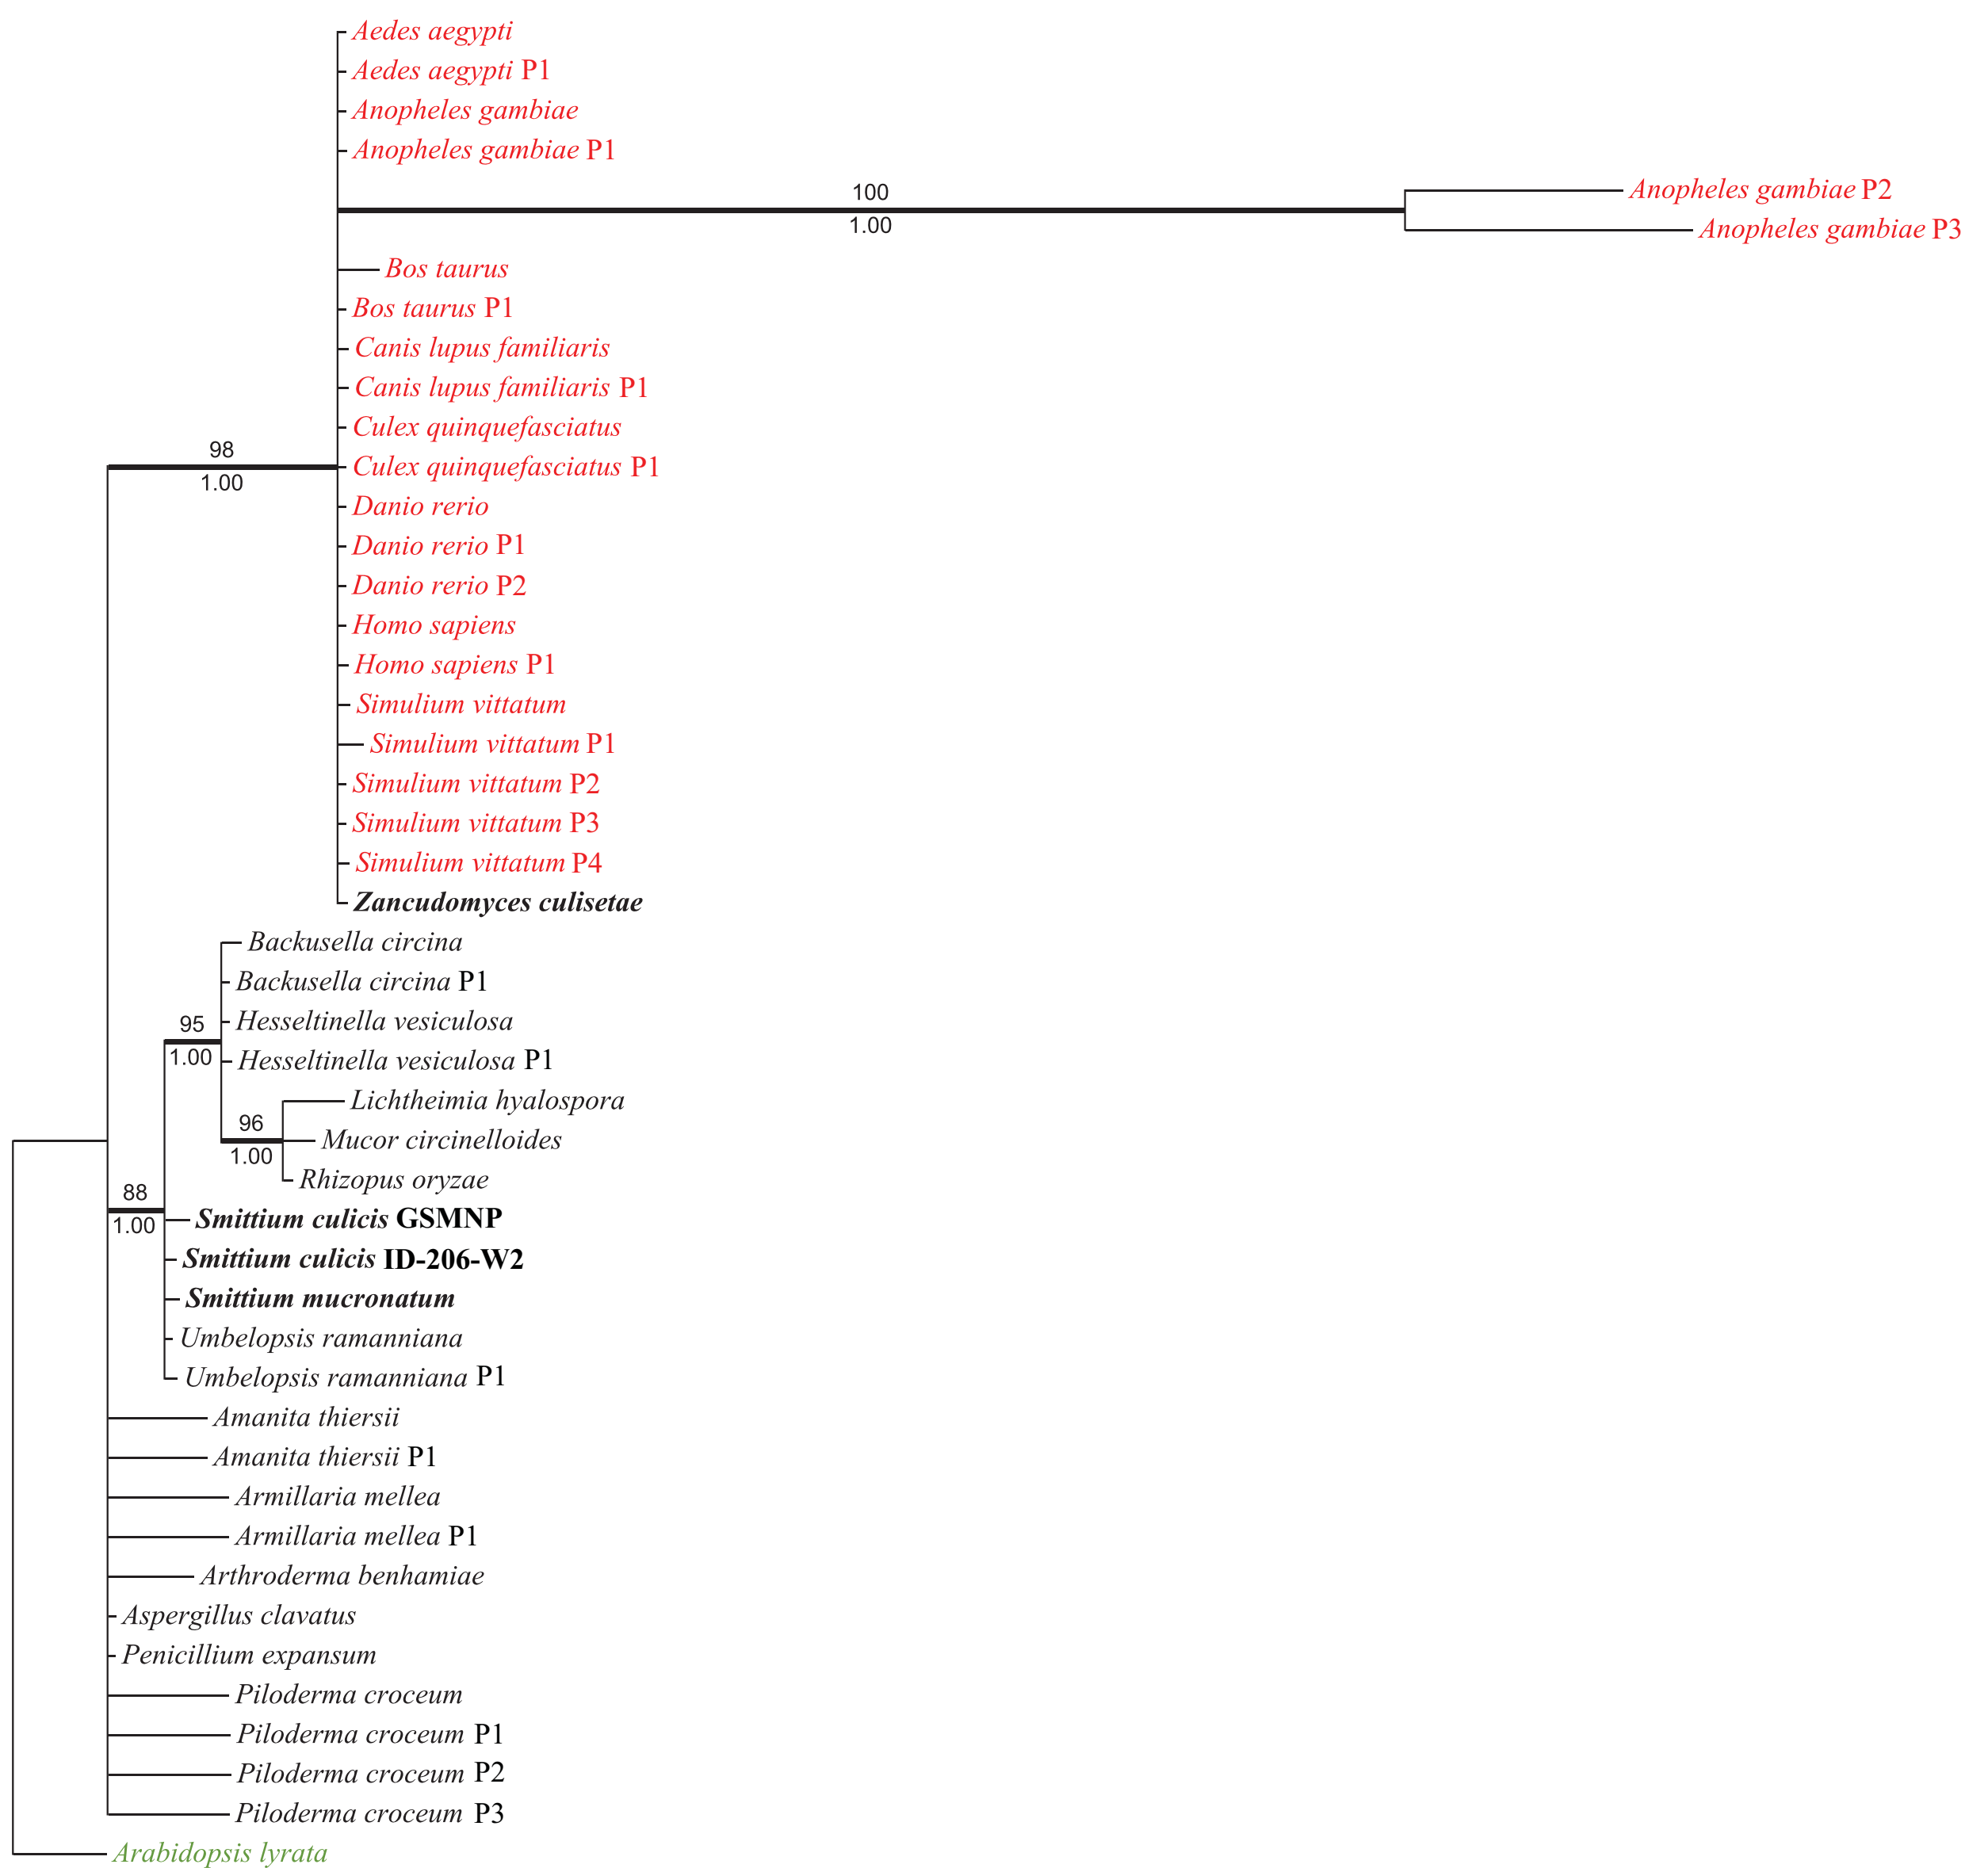

TMHMM posterior probabilities for S\_Tkc

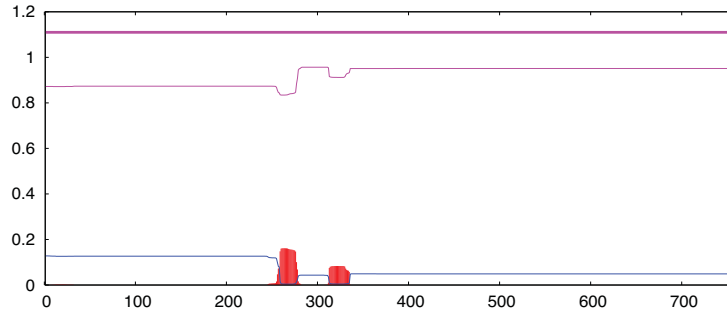

TMHMM posterior probabilities for Triple-ubiquitin

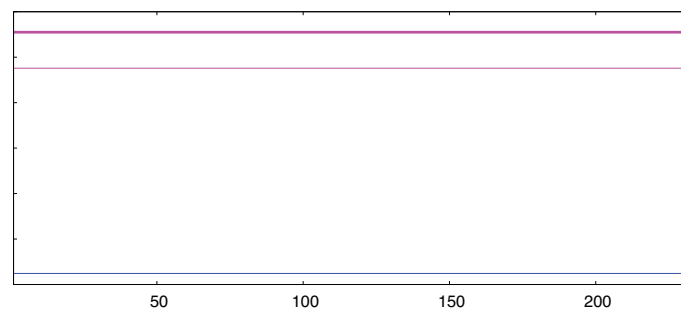

TMHMM posterior probabilities for LamG

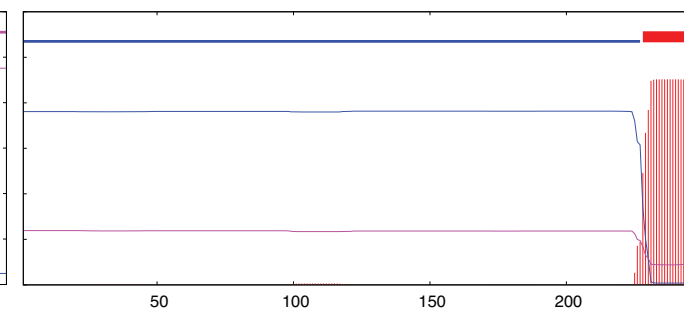

Legend

- Transmembrane
- Inside
- Outside

Supplementary Table 1. BLAT mapping results between five HGT candidates from *Z. culisetae* and Harpellales insect host genomes (triple-ubiquitin gene is identified as “g5282”).

| Q name | Q size | Q start | Q end | T name                   | T size  | T start | T end   | Matches | Mis-matches | Rep-matches | N's | Q gap count | Q gap bases | T gap count | T gap bases | Strand | Block count | Block sizes                      | qStarts                                                      | tStarts                                                                       |
|--------|--------|---------|-------|--------------------------|---------|---------|---------|---------|-------------|-------------|-----|-------------|-------------|-------------|-------------|--------|-------------|----------------------------------|--------------------------------------------------------------|-------------------------------------------------------------------------------|
| g5282  | 696    | 30      | 107   | Culex_scaffolds_50       | 1344033 | 597445  | 597978  | 69      | 4           | 0           | 0   | 1           | 4           | 1           | 460         | +      | 2           | 47,26,                           | 30,81,                                                       | 597445,597952,                                                                |
| g5282  | 696    | 441     | 488   | Blackfly_scaffolds_42610 | 3459    | 2574    | 2621    | 43      | 4           | 0           | 0   | 0           | 0           | 0           | 0           | -      | 1           | 47,                              | 208,                                                         | 2574,                                                                         |
| g2050  | 1986   | 118     | 177   | Aedes_scaffolds_80       | 2899062 | 2888586 | 2888642 | 44      | 0           | 0           | 0   | 1           | 15          | 2           | 12          | +      | 4           | 9,11,15,9,                       | 118,127,138,168,                                             | 2888586,2888601,2888618,2888633,                                              |
| g2050  | 1986   | 188     | 410   | Aedes_scaffolds_730      | 589389  | 366551  | 366931  | 120     | 1           | 0           | 0   | 5           | 101         | 10          | 259         | -      | 11          | 7,10,12,12,11,15,13,1,1,8,12,10, | 1576,1583,1596,1644,1656,1716,1739,1752,1768,1776,1788,6921, | 366551,366563,366581,366649,366700,366751,366767,366853,366874,366887,366921, |
| g5024  | 1117   | 557     | 1043  | Aedes_scaffolds_730      | 589389  | 366752  | 366951  | 81      | 1           | 0           | 0   | 3           | 404         | 6           | 117         | -      | 7           | 10,13,12,12,15,8,                | 74,84,427,439,451,535,552,                                   | 366752,366767,366785,366802,366887,366921,366943,                             |
| g5507  | 1143   | 141     | 231   | Chironomus_scaffolds_113 | 274809  | 153754  | 153859  | 83      | 4           | 0           | 0   | 2           | 3           | 4           | 18          | +      | 6           | 9,12,12,42,5,7,                  | 141,151,165,177,219,224,                                     | 153754,153766,153778,153796,153841,153852,                                    |

|       |      |     |     |                           |          |          |          |    |   |   |   |   |    |   |     |   |    |                        |                                          |                                                                          |
|-------|------|-----|-----|---------------------------|----------|----------|----------|----|---|---|---|---|----|---|-----|---|----|------------------------|------------------------------------------|--------------------------------------------------------------------------|
| g5507 | 1143 | 462 | 559 | Blackfly_scaffolds_121909 | 23588    | 7401     | 7528     | 81 | 0 | 0 | 0 | 3 | 16 | 8 | 46  | + | 10 | 21,6,4,8,8,5,5,7,6,11, | 462,483,490,502,510,518,523,528,535,548, | 7401,7424,7430,7443,7459,7469,7476,7491,7500,7517,                       |
| g5507 | 1143 | 488 | 559 | Blackfly_scaffolds_121909 | 23588    | 7391     | 7474     | 56 | 1 | 0 | 0 | 2 | 14 | 2 | 26  | + | 5  | 31,6,4,7,9,            | 488,519,526,543,550,                     | 7391,7424,7430,7434,7465,                                                |
| g5507 | 1143 | 126 | 223 | Anopheles_chromosome_5    | 41963435 | 23596654 | 23596741 | 77 | 4 | 0 | 0 | 2 | 16 | 3 | 6   | + | 4  | 25,12,28,16,           | 126,151,171,207,                         | 23596654,23596667,23596680,23596693,23596706,23596719,23596732,23596745, |
| g5507 | 1143 | 129 | 183 | Anopheles_chromosome_1    | 61545105 | 24188883 | 24189211 | 51 | 0 | 0 | 0 | 1 | 3  | 2 | 277 | + | 4  | 6,23,9,13,             | 129,138,161,170,                         | 24188883,24188896,24188909,24189218,24189231,                            |
| g5507 | 1143 | 104 | 174 | Aedes_scaffolds_93        | 2767225  | 1301935  | 1301987  | 50 | 1 | 0 | 0 | 2 | 19 | 1 | 1   | + | 3  | 24,12,15,              | 104,134,159,                             | 1301935,1301959,1301972,                                                 |
| g5507 | 1143 | 90  | 149 | Culex_scaffolds_220       | 618684   | 46854    | 46907    | 50 | 3 | 0 | 0 | 1 | 6  | 0 | 0   | - | 2  | 12,41,                 | 994,1012,                                | 46854,46866,                                                             |
| g5507 | 1143 | 135 | 182 | Anopheles_chromosome_6    | 24393108 | 8850622  | 8850671  | 45 | 2 | 0 | 0 | 0 | 0  | 2 | 2   | - | 3  | 11,31,5,               | 961,972,1003,                            | 8850622,8850634,8850666,                                                 |
| g5507 | 1143 | 101 | 174 | Aedes_scaffolds_694       | 626384   | 188088   | 188144   | 53 | 0 | 0 | 0 | 2 | 20 | 2 | 3   | - | 4  | 15,5,6,27,             | 969,997,1002,1015,                       | 188088,188104,188111,188117,                                             |
| g5507 | 1143 | 90  | 131 | Aedes_scaffolds_67        | 2980391  | 178778   | 178819   | 37 | 4 | 0 | 0 | 0 | 0  | 0 | 0   | - | 1  | 41,                    | 1012,                                    | 178778,                                                                  |
| g8181 | 1500 | 141 | 231 | Chironomus_scaffolds_113  | 274809   | 153754   | 153859   | 83 | 4 | 0 | 0 | 2 | 3  | 4 | 18  | + | 6  | 9,12,12,42,5,7,        | 141,151,165,177,219,224,                 | 153754,153766,153778,153796,153852,                                      |

|       |      |     |     |                           |          |          |          |     |   |   |   |   |     |   |    |   |   |                         |                                      |                                               |
|-------|------|-----|-----|---------------------------|----------|----------|----------|-----|---|---|---|---|-----|---|----|---|---|-------------------------|--------------------------------------|-----------------------------------------------|
| g8181 | 1500 | 438 | 481 | Blackfly_scaffolds_66111  | 6672     | 5174     | 5216     | 41  | 1 | 0 | 0 | 1 | 1   | 0 | 0  | + | 2 | 32,10,                  | 438,471,                             | 5174,5206,                                    |
| g8181 | 1500 | 190 | 525 | Blackfly_scaffolds_121909 | 23588    | 7443     | 7590     | 111 | 3 | 0 | 0 | 4 | 221 | 6 | 33 | + | 9 | 8,21,4,19,6,22,5,11,18, | 190,212,233,440,459,465,489,496,507, | 7443,7457,7479,7483,7506,7518,7550,7555,7572, |
| g8181 | 1500 | 126 | 223 | Anopheles_chromosome_5    | 41963435 | 23596654 | 23596741 | 77  | 4 | 0 | 0 | 2 | 16  | 3 | 6  | + | 4 | 25,12,28,16,            | 126,151,171,207,                     | 23596654,23596660,81,23596695,23596725,       |
| g8181 | 1500 | 398 | 454 | Anopheles_chromosome_5    | 41963435 | 23596601 | 23596660 | 54  | 2 | 0 | 0 | 0 | 0   | 1 | 3  | + | 2 | 5,51,                   | 398,403,                             | 23596609,1,23596609,                          |
| g8181 | 1500 | 392 | 451 | Anopheles_chromosome_1    | 61545105 | 42783707 | 42783766 | 57  | 2 | 0 | 0 | 0 | 0   | 0 | 0  | + | 1 | 59,                     | 392,                                 | 42783707,                                     |
| g8181 | 1500 | 424 | 487 | Anopheles_chromosome_1    | 61545105 | 42783703 | 42783770 | 58  | 5 | 0 | 0 | 0 | 0   | 1 | 4  | + | 2 | 56,7,                   | 424,480,                             | 42783703,42783763,                            |
| g8181 | 1500 | 104 | 174 | Aedes_scaffolds_93        | 2767225  | 1301935  | 1301987  | 50  | 1 | 0 | 0 | 2 | 19  | 1 | 1  | + | 3 | 24,12,15,               | 104,134,159,                         | 1301935,1301959,1301972,                      |
| g8181 | 1500 | 396 | 471 | Aedes_scaffolds_528       | 843722   | 16313    | 16386    | 69  | 4 | 0 | 0 | 1 | 2   | 0 | 0  | + | 2 | 35,38,                  | 396,433,                             | 16313,16348,                                  |
| g8181 | 1500 | 392 | 463 | Aedes_scaffolds_528       | 843722   | 16273    | 16344    | 65  | 6 | 0 | 0 | 0 | 0   | 0 | 0  | + | 1 | 71,                     | 392,                                 | 16273,                                        |
| g8181 | 1500 | 167 | 224 | Aedes_scaffolds_528       | 843722   | 16363    | 16421    | 51  | 1 | 0 | 0 | 2 | 5   | 4 | 6  | + | 6 | 4,7,4,16,4,17,          | 167,171,179,183,203,207,             | 16363,16368,16375,16380,16399,16404,          |
| g8181 | 1500 | 90  | 131 | Culex_scaffolds_220       | 618684   | 46866    | 46907    | 38  | 3 | 0 | 0 | 0 | 0   | 0 | 0  | - | 1 | 41,                     | 1369,                                | 46866,                                        |
| g8181 | 1500 | 404 | 461 | Culex_scaffolds_188       | 728313   | 179236   | 179313   | 53  | 0 | 0 | 0 | 1 | 4   | 3 | 24 | - | 5 | 6,8,23,5,11,            | 1039,1045,1053,1080,1085,            | 179236,179244,179260,179283,179302,           |

|       |      |     |     |                        |          |          |          |     |   |   |   |   |     |   |     |   |   |                |                                |                                                  |
|-------|------|-----|-----|------------------------|----------|----------|----------|-----|---|---|---|---|-----|---|-----|---|---|----------------|--------------------------------|--------------------------------------------------|
| g8181 | 1500 | 126 | 440 | Anopheles_chromosome_6 | 24393108 | 6806368  | 6806462  | 86  | 2 | 0 | 0 | 3 | 226 | 3 | 6   | - | 6 | 46,7,4,13,12,6 | 1060,1322,1329,1337,1350,1368, | 6806368,6806414,6806422,6806429,6806444,6806456, |
| g8181 | 1500 | 135 | 182 | Anopheles_chromosome_6 | 24393108 | 8850622  | 8850671  | 45  | 2 | 0 | 0 | 0 | 0   | 2 | 2   | - | 3 | 11,31,5        | 1318,1329,1360,                | 8850622,8850634,8850666,                         |
| g8181 | 1500 | 302 | 450 | Anopheles_chromosome_6 | 24393108 | 18746695 | 18746937 | 58  | 1 | 0 | 0 | 2 | 89  | 3 | 183 | - | 4 | 28,13,7,11,    | 1050,1079,1180,1187,           | 1874669,5,1874675,18746917,18746926,             |
| g8181 | 1500 | 179 | 227 | Anopheles_chromosome_6 | 24393108 | 6806365  | 6806414  | 44  | 0 | 0 | 0 | 1 | 4   | 3 | 5   | - | 4 | 20,4,16,4,     | 1273,1293,1301,1317,           | 6806365,6806386,6806393,6806410,                 |
| g8181 | 1500 | 142 | 425 | Anopheles_chromosome_5 | 41963435 | 30603952 | 30604011 | 49  | 1 | 0 | 0 | 1 | 233 | 2 | 9   | - | 3 | 13,16,21,      | 1075,1088,1337,                | 3060395,2,3060399,73,30603990,                   |
| g8181 | 1500 | 147 | 440 | Anopheles_chromosome_2 | 53200684 | 40760594 | 40760749 | 104 | 4 | 0 | 0 | 3 | 185 | 3 | 47  | - | 4 | 48,16,28,16,   | 1060,1277,1301,1337,           | 4076059,4,40760685,40760703,40760733,            |
| g8181 | 1500 | 430 | 478 | Anopheles_chromosome_1 | 61545105 | 17036174 | 17036229 | 44  | 1 | 0 | 0 | 1 | 3   | 3 | 10  | - | 4 | 6,7,27,5,      | 1022,1028,1038,1065,           | 1703617,4,17036187,17036195,17036224,            |
| g8181 | 1500 | 394 | 442 | Anopheles_chromosome_1 | 61545105 | 17036187 | 17036229 | 39  | 0 | 0 | 0 | 1 | 9   | 2 | 3   | - | 3 | 7,27,5,        | 1058,1074,1101,                | 1703618,7,17036195,17036224,                     |



|       |      |     |     |                         |            |            |            |    |   |   |   |   |    |   |   |   |   |                |                              |                                          |
|-------|------|-----|-----|-------------------------|------------|------------|------------|----|---|---|---|---|----|---|---|---|---|----------------|------------------------------|------------------------------------------|
| g8181 | 1500 | 101 | 174 | Aedes_scaffolds_69<br>4 | 6263<br>84 | 1880<br>88 | 1881<br>44 | 53 | 0 | 0 | 0 | 2 | 20 | 2 | 3 | - | 4 | 15,5,6,<br>27, | 1326,135<br>4,1359,1<br>372, | 188088,1<br>88104,18<br>8111,188<br>117, |
| g8181 | 1500 | 306 | 345 | Aedes_scaffolds_50<br>8 | 8898<br>04 | 5198<br>23 | 5198<br>59 | 35 | 1 | 0 | 0 | 1 | 3  | 0 | 0 | - | 2 | 6,30,          | 1155,116<br>4,               | 519823,5<br>19829,                       |

Legend:

1. Q name - Query sequence name
2. Q size - Query sequence size
3. Q start - Alignment start position in query
4. Q end - Alignment end position in query
5. T name - Target sequence name
6. T size - Target sequence size
7. T start - Alignment start position in target
8. T end - Alignment end position in target
9. Matches - Number of bases that match that aren't repeats
10. Mismatches - Number of bases that don't match
11. Repmatches - Number of bases that match but are part of repeats
12. N's - Number of 'N' bases
13. Q gap count - Number of inserts in query
14. Q gap bases - Number of bases inserted in query
15. T gap count - Number of inserts in target
16. T gap bases - Number of bases inserted in target
17. Strand - '+' or '-' for query strand. For translated alignments, second '+' or '-' is for genomic
18. Block count - Number of blocks in the alignment (a block contains no gaps)
19. Block sizes - Comma-separated list of sizes of each block
20. qStarts - Comma-separated list of starting positions of each block in query
21. tStarts - Comma-separated list of starting positions of each block in target

Supplementary Table 2. All homologs detected from the examined eukaryotic genomes using *Z. culisetae*'s triple-ubiquitin gene as a query (E-value < 1E<sup>-100</sup>).

| Strains                         | Copy No. of Polyubiquitin gene | Ortholog (O) or Paralog (P) | Location               | Repeat No. | Upstream      | Downstream              | E-value            |
|---------------------------------|--------------------------------|-----------------------------|------------------------|------------|---------------|-------------------------|--------------------|
| <i>Aspergillus clavatus</i>     | 1                              | O                           | Scaffold_1099423829800 | 4          | GAL           | RRM_ETP1                | 3E <sup>-153</sup> |
| <i>Arthroderma benhamiae</i>    | 1                              | O                           | Supercontig_42         | 3          | GAL           | Pkc-like                | 4E <sup>-153</sup> |
| <i>Penicillium expansum</i>     | 1                              | O                           | Scaffold_2             | 4          | GAL           | RRM_ETP1                | 6E <sup>-153</sup> |
| <i>Amanita thiersii</i>         | 2                              | O                           | Scaffold_1             | 5          | WD40          | PIN_SF                  | 3E <sup>-153</sup> |
|                                 |                                | P1                          | Scaffold_27            | 4          | FAM72         | SET                     | 2E <sup>-154</sup> |
| <i>Armillaria mellea</i>        | 2                              | O                           | Scaffold_NODE_108303   | 5          | DUF2012       | WD40                    | 2E <sup>-153</sup> |
|                                 |                                | P1                          | Scaffold_NODE_100039   | 5          | FAM72         | SET                     | 1E <sup>-148</sup> |
| <i>Piloderma croceum</i>        | 4                              | O                           | Scaffold_00016         | 5          | WD40          | PIN_SF                  | 2E <sup>-153</sup> |
|                                 |                                | P1                          | Scaffold_00043         | 3          | N/A           | cytidine deaminase-like | 2E <sup>-156</sup> |
|                                 |                                | P2                          | Scaffold_00043         | 3          | N/A           | N/A                     | 9E <sup>-156</sup> |
|                                 |                                | P3                          | Scaffold_29            | 4          | Pkc-like      | N/A                     | 2E <sup>-154</sup> |
| <i>Backusella circina</i>       | 2                              | O                           | Scaffold_257           | 4          | ALDH_SF       | Suf                     | 7E <sup>-149</sup> |
|                                 |                                | P1                          | Scaffold_75            | 5          | P-loop NTPase | N/A                     | 5E <sup>-149</sup> |
| <i>Hesseltinella vesiculosa</i> | 2                              | O                           | Scaffold_6             | 4          | N/A           | Suf                     | 3E <sup>-150</sup> |

|                                 |   |    |                  |     |                                    |               |                    |
|---------------------------------|---|----|------------------|-----|------------------------------------|---------------|--------------------|
|                                 |   | P1 | Scaffold_14      | 3   | P-loop_NTPase                      | N/A           | 2E <sup>-151</sup> |
| <i>Mucor circinelloides</i>     | 1 | O  | Scaffold_13      | 5   | N/A                                | Suf           | 7E <sup>-150</sup> |
| <i>Lichtheimia hyalospora</i>   | 1 | O  | Scaffold_4       | 4   | P-loop_NTPase                      | Kinesin       | 5E <sup>-152</sup> |
| <i>Rhizopus oryzae</i>          | 1 | O  | Scaffold_3.9     | 3   | N/A                                | Suf           | 4E <sup>-153</sup> |
| <i>Umbelopsis ramanniana</i>    | 2 | O  | Scaffold_63      | 5   | AdoMet_Mtases                      | Adaptin_N     | 8E <sup>-152</sup> |
|                                 |   | P1 | Scaffold_16      | 3   | Lysozyme-like                      | Zf-AN1        | 2E <sup>-117</sup> |
| <i>Zancudomyces culisetae</i>   | 1 | O  | Scaffold_1672    | 3   | Lamg                               | S_Tkc         | 1E <sup>-165</sup> |
| <i>Smittium culicis</i> GSMNP   | 1 | O  | Scaffold_5123    | 3.5 | N/A                                | N/A           | 4E <sup>-154</sup> |
| <i>Smittium culicis</i> ID206W2 | 1 | O  | Scaffold_922     | 2.5 | N/A                                | N/A           | 2E <sup>-107</sup> |
| <i>Smittium mucronatum</i>      | 1 | O  | Scaffold_2577    | 1.5 | N/A                                | N/A           | 1E <sup>-64</sup>  |
| <i>Anopheles gambiae</i>        | 4 | O  | Chr_2R           | 14  | Rnase_Zc3h12a+tetra-UBQ+triple-UBQ | PDCD2_C       | 5E <sup>-151</sup> |
|                                 |   | P1 | Chr_2R           | 3.5 | NT_Pol-beta-like                   | FAST_2        | 1E <sup>-160</sup> |
|                                 |   | P2 | Chr_2R           | 3   | Rnase_Zc3h12a+tetra-UBQ            | UBQx14        | 1E <sup>-112</sup> |
|                                 |   | P3 | Chr_2R           | 4   | Rnase_Zc3h12a                      | triple-UBQ    | 4E <sup>-107</sup> |
| <i>Aedes aegypti</i>            | 2 | O  | Supercontig_1.99 | 8   | PDCD2_C+UBQ+di-UBQ                 | Rnase_Zc3h12a | 2E <sup>-156</sup> |
|                                 |   | P1 | Supercontig_1.17 | 4   | NT_Pol-beta-like                   | RAP+FAST_2    | 9E <sup>-161</sup> |

|                               |   |    |                   |     |                  |               |             |
|-------------------------------|---|----|-------------------|-----|------------------|---------------|-------------|
| <i>Culex quinquefasciatus</i> | 2 | O  | Supercontig_3.50  | 14  | PDCD2_C+di-UBQ   | Rnase_Zc3h12a | $5E^{-151}$ |
|                               |   | P1 | Supercontig_3.448 | 7   | NT_Pol-beta-like | RAP           | $2E^{-157}$ |
| <i>Simulium vittatum</i>      | 5 | O  | Scf7180000737758  | 7   | N/A              | N/A           | $1E^{-157}$ |
|                               |   | P1 | Scf7180000782555  | 3   | N/A              | RAP           | $3E^{-161}$ |
|                               |   | P2 | Scf7180000712356  | 6   | N/A              | N/A           | $6E^{-159}$ |
|                               |   | P3 | Scf7180000776578  | 6.5 | NT_Pol-beta-like | N/A           | $4E^{-158}$ |
|                               |   | P4 | Scf71800007       | 4   | N/A              | N/A           | $1E^{-138}$ |
| <i>Homo sapiens</i>           | 2 | O  | Chr_NC_000012.12  | 9   | P-loop_NTPase    | CD36          | $9E^{-155}$ |
|                               |   | P1 | Chr_NC_000017.11  | 3   | N/A              | N/A           | $1E^{-161}$ |
| <i>Bos taurus</i>             | 2 | O  | Chr_AC_000174.1   | 4   | P-loop_NTPase    | CD36          | $1E^{-154}$ |
|                               |   | P1 | Chr_AC_000176.1   | 4   | ER               | ANK           | $3E^{-159}$ |
| <i>Canis lupus familiaris</i> | 2 | O  | Chr_NC_006608.3   | 5   | P-loop_NTPase    | CD36          | $5E^{-159}$ |
|                               |   | P1 | Chr_NC_006587.3   | 3   | GFA              | ANK           | $3E^{-160}$ |
| <i>Danio rerio</i>            | 3 | O  | Chr_NC_007121.6   | 7   | Sulfotransfer_1  | CD36          | $1E^{-156}$ |
|                               |   | P1 | Chr_NC_007116.6   | 8   | Chemokine_CXC    | P2X_receptor  | $5E^{-156}$ |
|                               |   | P2 | Chr_NC_007116.6   | 6   | GFA              | Chemokine_CXC | $1E^{-150}$ |
